# Supplementary material for: Tough supramolecular hydrogels of poly(N,N-dimethylacrylamide)-grafted poly(methacrylic acid) with cooperative hydrogen bonds as physical crosslinks
Source: Royal Society of Chemistry journal article supplement (doi:10.1039/d4sm00882k), 2024-01-01
Supplement: d4sm00882k1.pdf [file d4sm00882k1.pdf]

## Supporting Information

### **Tough supramolecular hydrogels of poly(*N,N*-dimethylacrylamide)-grafted poly(methacrylic acid) with cooperative hydrogen bonds as physical crosslinks**

Cuihong Ma<sup>a,†</sup>, Cong Du<sup>b,†,\*</sup>, Qing Bo Tong<sup>a</sup>, Xin Ning Zhang<sup>a</sup>, Miao Du<sup>a</sup>, Qiang Zheng<sup>a</sup>, Zi Liang Wu<sup>a,\*</sup>

<sup>a</sup>Ministry of Education Key Laboratory of Macromolecular Synthesis and Functionalization, Department of Polymer Science and Engineering, Zhejiang University, Hangzhou 310027, China;

<sup>b</sup>State Key Laboratory of Bio-Fibers and Eco-Textiles, College of Materials Science and Engineering, Qingdao University, Qingdao 266071, China

†They contributed equally to this work.

\*Corresponding authors. E-mail: cong.du@qdu.edu.cn, wuziliang@zju.edu.cn



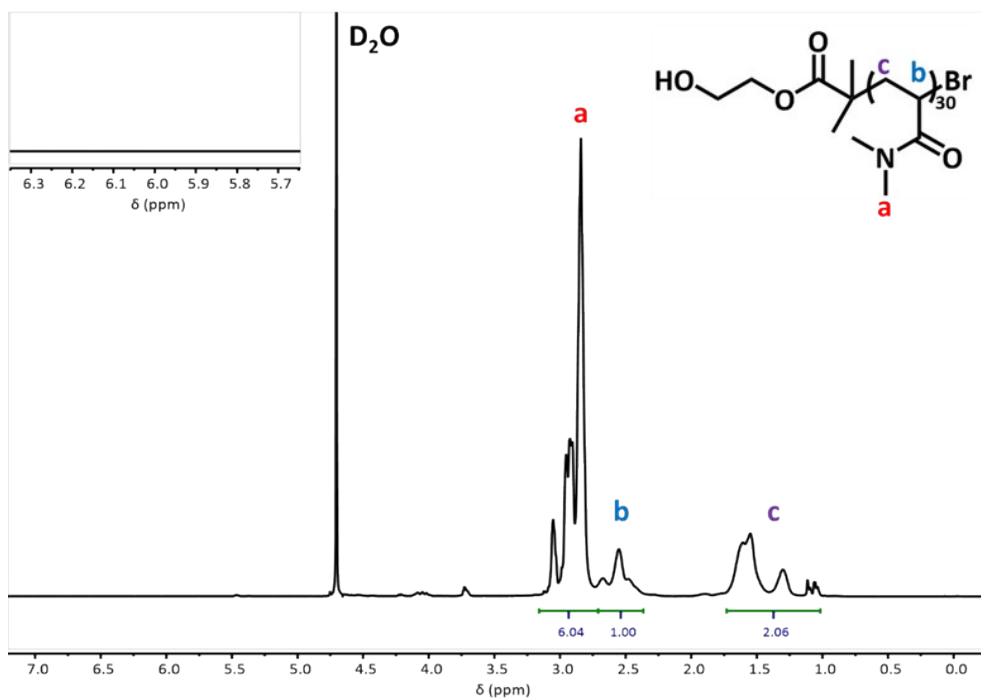

**Fig. S2**  $^1\text{H-NMR}$  spectrum of PDMAA oligomer by using  $\text{D}_2\text{O}$  (4.70 ppm) as the deuterated reagent.

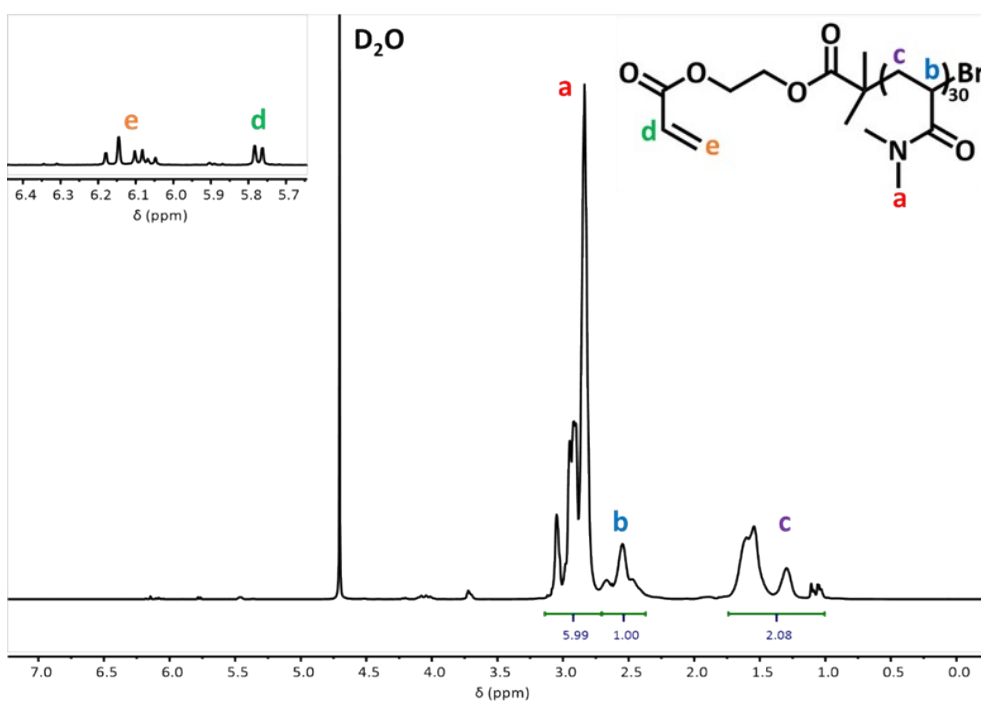

**Fig. S3**  $^1\text{H-NMR}$  spectrum of PDMAA macromonomer by using  $\text{D}_2\text{O}$  (4.70 ppm) as the deuterated reagent.

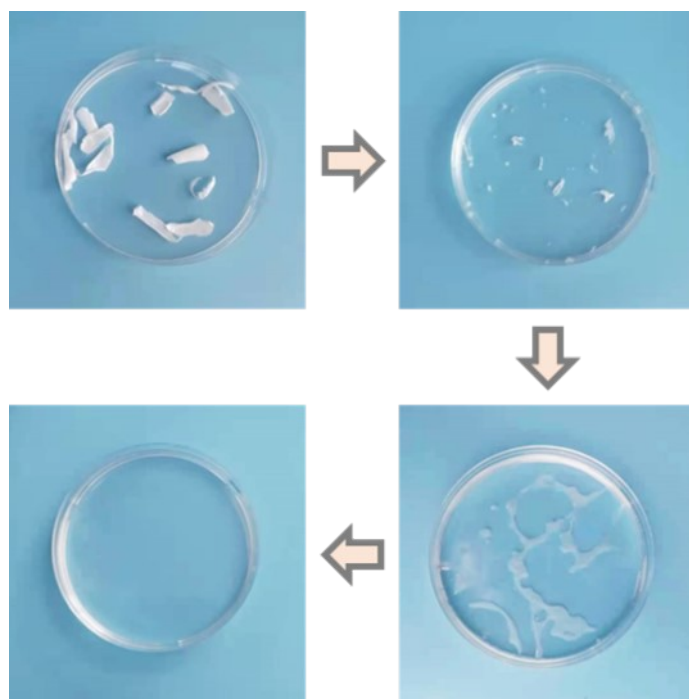

**Fig. S4** The dissolution of GP-0.4 hydrogel in 1 M NaOH solution (pH = 14) at room temperature in 1 h.

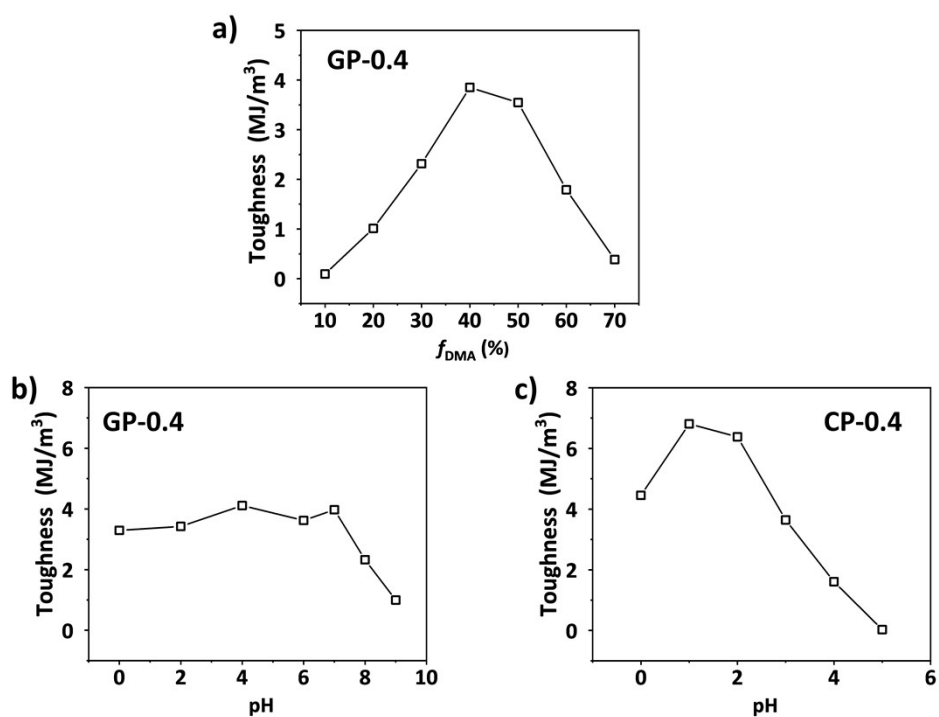

**Fig. S5** (a) Toughness of the equilibrated GP hydrogels with different  $f$ . (b,c) Toughness of the GP-0.4 (b) and CP-0.4 (c) hydrogels equilibrated in aqueous conditions with different pH values at room temperature.

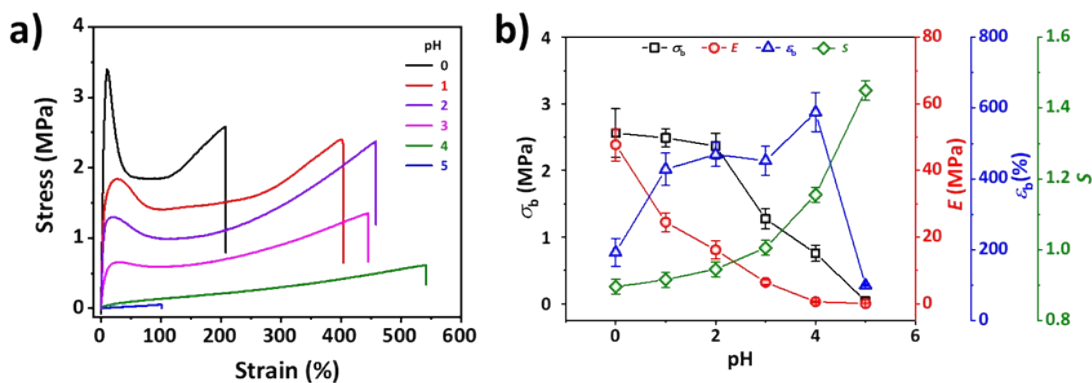

**Fig. S6** Tensile stress-strain curves (a) and corresponding mechanical parameters (b) of the CP-0.4 hydrogels equilibrated in aqueous conditions with different pH values at room temperature. The swelling ratio in length,  $S$ , respected to the length of the gel at pH = 7 is also shown in (b).

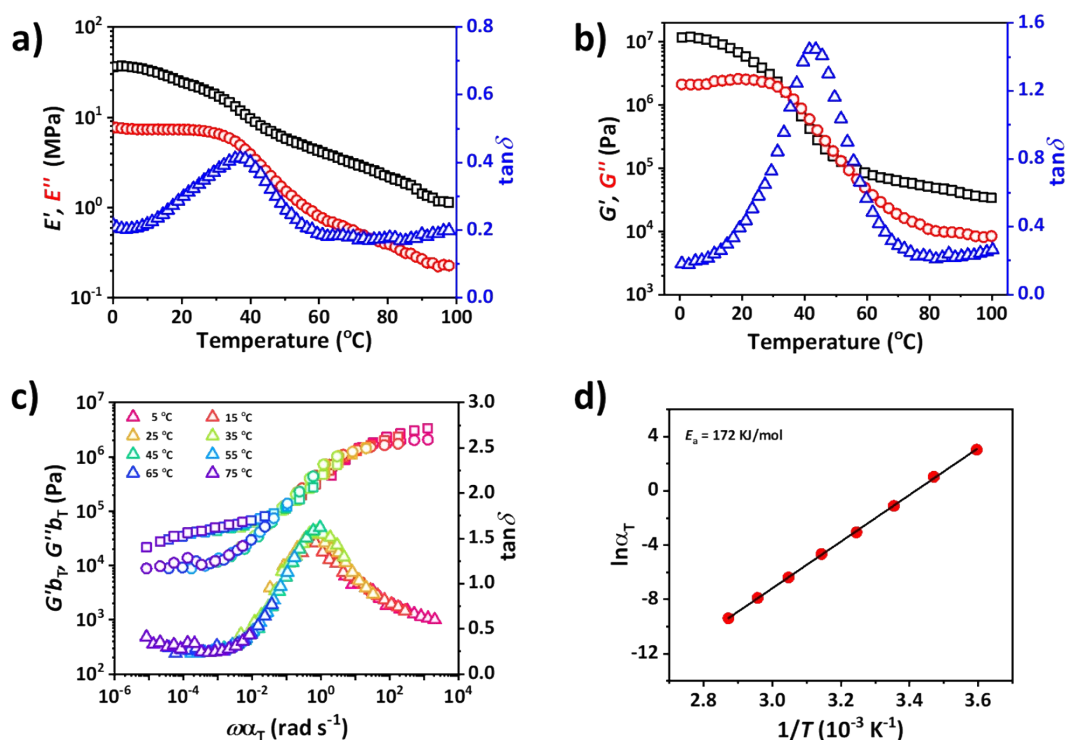

**Fig. S7** (a) DMA spectra of the CP-0.4 gel with a heating rate of 1 °C/min. DMA measurement is performed in a single cantilever beam mode at a frequency of 1 Hz. (b) Temperature sweep of the GP-0.4 gel from 5 to 100 °C at a frequency of 5 Hz and strain amplitude of 0.2%. Heating rate: 5 °C/min. (c) Dynamic moduli and loss factor spectra of the GP-0.4 gel following TTS with the reference temperature of 20 °C. (d) Arrhenius plot of the horizontal shift factor  $\alpha_T$ . The apparent activation energy  $E_a$  is calculated from the slope of the curve.

**Table S1** The recipes of precursor solutions for GP hydrogels with different  $f$ .

| Hydrogel | PDMAA-macromonomer<br>[g] | MAAc<br>[g] | ABVN<br>[mg] | Solvent<br>[g] |
|----------|---------------------------|-------------|--------------|----------------|
| GP-0.1   | 0.6                       | 5.4         | 85.38        | 13.91          |
| GP-0.2   | 1.2                       | 4.8         | 84.24        | 13.91          |
| GP-0.3   | 1.8                       | 4.2         | 83.10        | 13.92          |
| GP-0.4   | 2.4                       | 3.6         | 81.96        | 13.92          |
| GP-0.5   | 3.0                       | 3.0         | 80.84        | 13.92          |
| GP-0.6   | 3.6                       | 2.4         | 79.70        | 13.92          |
| GP-0.7   | 4.2                       | 1.8         | 78.56        | 13.92          |

**Table S2** The recipes of the precursor solution for CP-0.4 hydrogels.

| Hydrogel | DMAA<br>[g] | MAAc<br>[g] | APS<br>[mg] | H <sub>2</sub> O<br>[g] |
|----------|-------------|-------------|-------------|-------------------------|
| CP-0.4   | 2.4         | 3.6         | 75.31       | 13.92                   |

**Table S3** Elemental analysis results of the equilibrated GP and CP hydrogels. The top and bottom rows for each sample are the experimental value and theoretical value, respectively.

| Hydrogel | N (wt%)   | C (wt%)    | H (wt%)   |
|----------|-----------|------------|-----------|
| GP-0.1   | 1.24±0.08 | 55.77±0.22 | 7.50±0.01 |
|          | 1.41      | 56.29      | 7.19      |
| GP-0.2   | 2.31±0.04 | 56.32±0.37 | 7.51±0.09 |
|          | 2.83      | 56.77      | 7.40      |
| GP-0.3   | 3.99±0.08 | 56.92±0.35 | 7.71±0.04 |
|          | 4.24      | 57.25      | 7.61      |
| GP-0.4   | 5.35±0.07 | 57.68±0.41 | 8.00±0.03 |
|          | 5.66      | 57.73      | 7.82      |
| GP-0.5   | 6.66±0.07 | 58.54±0.50 | 8.10±0.19 |
|          | 7.07      | 58.21      | 8.03      |
| GP-0.6   | 7.96±0.05 | 58.07±0.01 | 8.16±0.25 |
|          | 8.48      | 58.69      | 8.25      |
| GP-0.7   | 9.03±0.09 | 59.86±0.10 | 8.07±0.35 |
|          | 9.90      | 59.17      | 8.46      |
| CP-0.4   | 5.91±0.09 | 57.61±0.02 | 7.99±0.08 |
|          | 5.66      | 57.73      | 7.82      |
